# Supplementary material for: Stream Macroinvertebrate Response Models for Bioassessment Metrics: Addressing the Issue of Spatial Scale
Source: PLoS One. 2014 Mar 27;9(3):e90944. doi: 10.1371/journal.pone.0090944 (PMC3968005; doi:10.1371/journal.pone.0090944)
Supplement: Appendix S1 — List of GIS data sets and their sources. (DOCX) [file pone.0090944.s003.docx]

**Appendix 1.** GIS datasets and their sources.*

| | Spatial Dataset | Data Source | Source Data format | Processing format | Resolution/Scale | Reference | | --- | --- | --- | --- | --- | --- | | Ecoregions | EPA Omernik's Level  III Ecoregions | Vector | Vector | 1:7,500,000 | U.S Environmental Protection Agency Dataset, Digital data  Available at URL: http://www.epa.gov/wed/pages/ecoregions/level_iii_iv.htm | | Elevation | National Elevation  Dataset (NED) | Raster | Raster | 10 meter | U.S. Geological Survey, National Elevation Dataset, Digital data, Available at URL: http://nationalmap.gov/ | | Slope | National Elevation  Dataset (NED) | Raster | Raster | 10 meter | U.S. Geological Survey, National Elevation Dataset, Digital data, Available at URL: http://nationalmap.gov/ | | Land Cover 2001 | National Land Cover Dataset 2001(NLCD) | Raster | Raster | 30 meter | U.S. Geological Survey, National Land Cover Dataset 2001, Digital  data, Available at URL: http://www.mrlc.gov/ | | Road Networks | U.S. Census Bureau  Tiger | Vector | Vector | 1:100,000 | U.S. Census Bureau, TIGER line data, Digital data, Available at  URL: http://www.census.gov/geo/www/tiger/ | | Soil Infiltration  Capacity | USDA NRCS  STATSGO | Vector | Vector | 1:250,000 | Natural Resource Conservation Service, STATSGO soils data,  Digital data, Available at URL: http://datagateway.nrcs.usda.gov/ | | Hydrography | National Hydrography Dataset (NHD) | Vector | Vector | 1:24,000 | U.S. Geological Survey, National Hydrography Dataset, Digital  data, Available at URL: http://nhd.usgs.gov/data.html | | Dams | National Inventory of Dams | Vector | Vector | Various | U.S. Army Corps of Engineers, National Inventory of Dams, Digital  data, Not publicly available | | Pollution Point  Sources | EPA Toxic Release Inventory | Vector | Vector | Various | U.S. Environmental Protection Agency, Toxic Release Inventory  data, Digital data, Available at URL: http://www.epa.gov/tri/tridata/tri05/data | | Precipitation | Oregon State University PRISM | Raster | Raster | 30 arc-second | PRISM Group, Oregon State University, Precipitation data for the  U.S., Digital data, Available at URL: http://www.prismclimate.org | | Population Density | U.S. Census Bureau Census 2000 | Vector | Vector | 30 meter | U.S. Census Bureau, Census 2000, Digital data, Available at URL: http://www.census.gov/main/www/cen2000.html | | Canopy Cover | National Land Cover Dataset 2001 Percent  Tree Canopy | Raster | Raster | 30 meter | U.S. Geological Survey, National Land Cover Dataset 2001,  Percent Tree Canopy (Version 1.0) Dataset. Digital Data. Available  at URL: http://www.mrlc.gov | |
| --- | --- | --- | --- | --- | --- | --- | --- | --- | --- | --- | --- | --- | --- | --- | --- | --- | --- | --- | --- | --- | --- | --- | --- | --- | --- | --- | --- | --- | --- | --- | --- | --- | --- | --- | --- | --- | --- | --- | --- | --- | --- | --- | --- | --- | --- | --- | --- | --- | --- | --- | --- | --- | --- | --- | --- | --- | --- | --- | --- | --- | --- | --- | --- | --- | --- | --- | --- | --- | --- | --- | --- | --- | --- | --- | --- | --- | --- | --- |

* TIGER–Topologically Integrated Geographic Encoding and Referencing, PRISM– Parameter-elevation Regressions on Independent Slopes Model, STATSGO–State Soil Geographic data base.
